# Supplementary material for: Computational challenges and human factors influencing the design and use of clinical research participant eligibility pre-screening tools
Source: Springer Nature journal article supplement (doi:10.1186/1472-6947-12-47), 2012-05-30

## Usability Average Task Completion Time

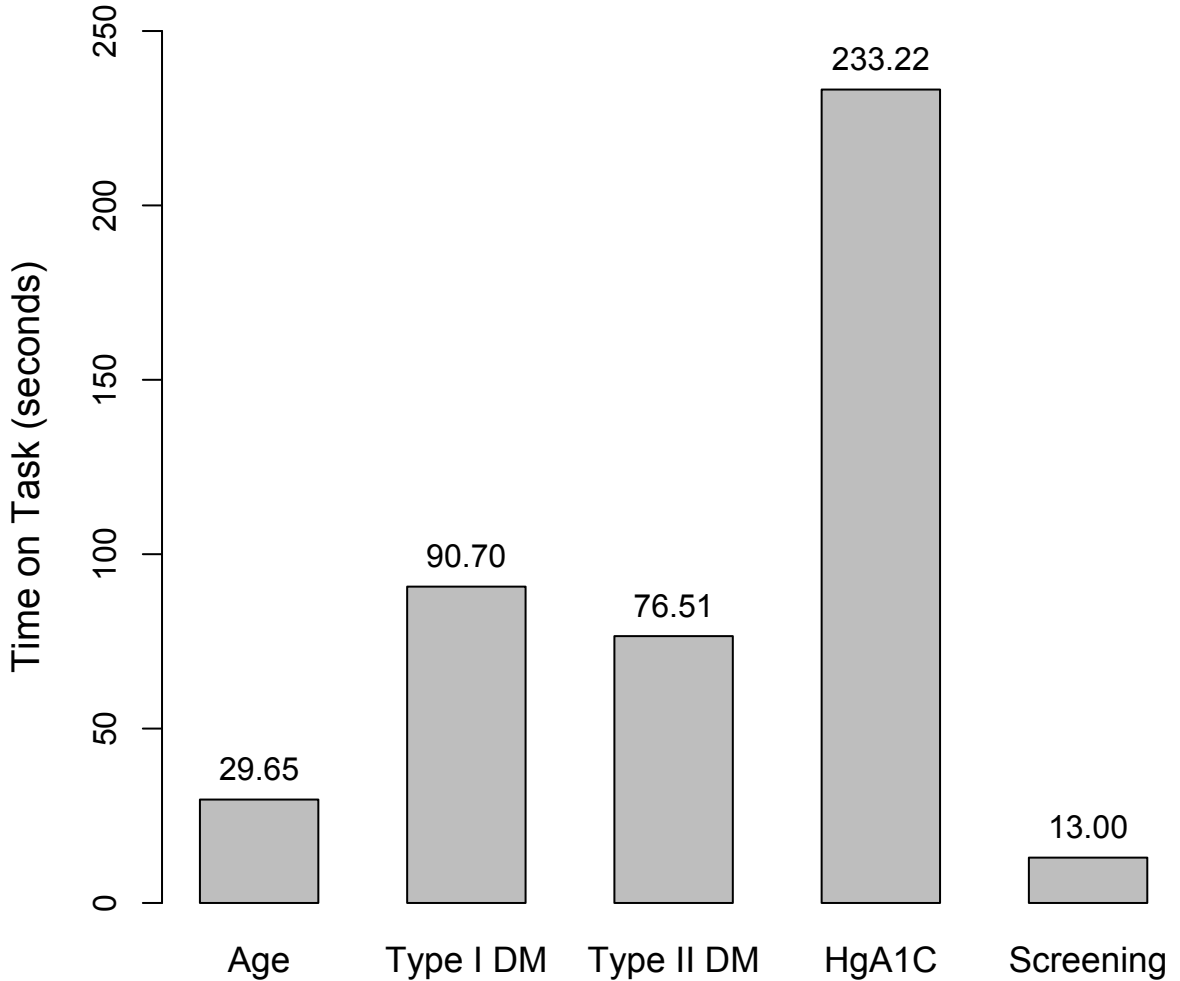

Supplement: 12911_2012_498_MOESM4_ESM.pdf [file 12911_2012_498_MOESM4_ESM.pdf]
